# Supplementary material for: TFPI Alpha and Beta Regulate mRNAs and microRNAs Involved in Cancer Biology and in the Immune System in Breast Cancer Cells
Source: PLoS One. 2012 Oct 5;7(10):e47184. doi: 10.1371/journal.pone.0047184 (PMC3465304; doi:10.1371/journal.pone.0047184)
Supplement: Table S3 — Functional annotation of differentially expressed mRNAs following overexpression of TFPIα or TFPIβ. All the significant categories involved in molecular and cellular function and diseases and disorders as annotated by the Ingenuity Pathway Analysis software are listed. (XLS) [file pone.0047184.s005.xls]

## Sheet: Sheet1
Table S3.
pTOPO vs. TFPIa	Significance	# Genes	pTOPO vs. TFPIb	Significance	# Genes
Gene ontology category			Gene ontology category
Molecular and cellular function			Molecular and cellular function
Gene Expression	1.20E-07-9.31E-03	37	Cellular Growth and Proliferation	9.92E-08-1.92E-02	106
Cell Death	1.20E-06-1.07E-02	64	Cellular Movement	1.14E-07-1.93E-02	97
Cellular Development	3.41E-06-1.09E-02	47	Carbohydrate Metabolism	2.16E-05-1.83E-02	21
Cellular Movement	1.05E-05-7.82E-03	38	Cell Death	2.72E-05-1.86E-02	133
Cellular Growth and Proliferation	1.13E-05-1.07E-02	52	Cell-To-Cell Signaling and Interaction	6.18E-05-1.61E-02	81
Cell-To-Cell Signaling and Interaction	3.40E-05-1.09E-02	45	Cell Morphology	6.38E-05-1.92E-02	78
Cellular Function and Maintenance	1.49E-04-1.09E-02	26	Cellular Assembly and Organization	6.38E-05-1.92E-02	72
Cell Morphology	1.53E-04-1.09E-02	17	Cellular Function and Maintenance	1.23E-04-1.97E-02	45
Cellular Assembly and Organization	1.53E-04-4.41E-03	12	Protein Synthesis	1.23E-04-1.23E-04	9
Post-Translational Modification	1.53E-04-8.71E-04	6	Cellular Development	1.46E-04-1.92E-02	95
Protein Folding	1.53E-04-1.53E-04	2	Cell Cycle	5.25E-04-2.00E-02	48
Antigen Presentation	2.34E-04-2.22E-03	11	Free Radical Scavenging	9.53E-04-9.53E-04	12
DNA Replication, Recombination, and Repair	9.03E-04-4.08E-03	6	Lipid Metabolism	1.33E-03-1.92E-02	56
Nucleic Acid Metabolism	9.03E-04-9.18E-03	5	Molecular Transport	1.33E-03-1.92E-02	30
Small Molecule Biochemistry	9.03E-04-9.03E-04	2	Small Molecule Biochemistry	1.33E-03-1.92E-02	72
Cell Cycle	1.12E-03-1.07E-02	8	Cellular Response to Therapeutics	1.76E-03-9.96E-03	5
Cell Signaling	1.37E-03-2.33E-03	10	Gene Expression	3.51E-03-1.89E-02	11
Molecular Transport	1.49E-03-7.15E-03	5	Drug Metabolism	5.12E-03-1.61E-02	8
Protein Trafficking	1.49E-03-7.15E-03	5	Cell Signaling	5.57E-03-6.56E-03	15
Protein Degradation	2.47E-03-2.47E-03	8	Vitamin and Mineral Metabolism	6.56E-03-9.96E-03	7
Protein Synthesis	2.47E-03-2.47E-03	8	DNA Replication, Recombination, and Repair	8.62E-03-1.30E-02	13
Cellular Compromise	4.08E-03-4.08E-03	2	Amino Acid Metabolism	9.96E-03-1.61E-02	4
Diseases and disorders			Cellular Compromise	9.96E-03-1.89E-02	9
Infection Mechanism	3.56E-16-9.31E-03	44	Post-Translational Modification	9.96E-03-1.61E-02	10
Antimicrobial Response	2.00E-14-3.09E-03	17	Nucleic Acid Metabolism	1.30E-02-1.30E-02	8
Inflammatory Response	2.00E-14-8.98E-03	56	Antigen Presentation	1.61E-02-1.61E-02	2
Organismal Injury and Abnormalities	9.91E-14-5.96E-03	39	Protein Trafficking	1.61E-02-1.61E-02	2
Infectious Disease	3.36E-07-1.04E-02	43	Diseases and disorders
Immunological Disease	6.84E-07-9.31E-03	55	Genetic Disorder	1.35E-07-1.02E-02	361
Cancer	1.22E-06-1.06E-02	70	Cancer	1.40E-05-1.92E-02	183
Inflammatory Disease	2.05E-06-7.71E-03	67	Reproductive System Disease	1.40E-05-1.53E-02	92
Reproductive System Disease	3.17E-06-5.96E-03	19	Cardiovascular Disease	2.19E-05-1.87E-02	143
Hepatic System Disease	7.15E-05-7.82E-03	29	Endocrine System Disorders	2.54E-04-1.70E-03	144
Hematological Disease	1.05E-04-1.09E-02	24	Metabolic Disease	2.54E-04-1.70E-03	156
Connective Tissue Disorders	1.15E-04-7.82E-03	43	Renal and Urological Disease	3.79E-04-4.58E-03	7
Skeletal and Muscular Disorders	1.15E-04-6.92E-03	39	Gastrointestinal Disease	3.84E-04-1.92E-02	90
Respiratory Disease	1.54E-04-5.41E-03	24	Inflammatory Disease	3.84E-04-1.64E-02	168
Developmental Disorder	3.80E-04-1.07E-02	12	Infectious Disease	6.89E-04-9.96E-03	6
Gastrointestinal Disease	3.88E-04-7.82E-03	25	Neurological Disease	6.89E-04-1.53E-02	210
Genetic Disorder	4.55E-04-5.84E-03	30	Skeletal and Muscular Disorders	6.89E-04-1.53E-02	11
Neurological Disease	4.84E-04-7.71E-03	20	Developmental Disorder	8.83E-04-1.83E-02	31
Nutritional Disease	4.87E-04-1.57E-03	4	Respiratory Disease	1.67E-03-9.41E-03	49
Cardiovascular Disease	9.03E-04-8.60E-03	17	Immunological Disease	1.70E-03-3.81E-03	147
Ophthalmic Disease	9.33E-04-8.56E-03	11	Inflammatory Response	1.76E-03-1.61E-02	4
Dermatological Diseases and Conditions	1.49E-03-1.49E-03	2	Connective Tissue Disorders	5.12E-03-7.06E-03	3
Renal and Urological Disease	1.49E-03-1.04E-02	20	Hematological Disease	5.12E-03-5.12E-03	2
Endocrine System Disorders	5.71E-03-7.82E-03	13	Dermatological Diseases and Conditions	9.96E-03-9.96E-03	2
Metabolic Disease	5.71E-03-7.82E-03	11	Infection Mechanism	9.96E-03-1.67E-02	5
			Ophthalmic Disease	1.61E-02-1.61E-02	2
			Organismal Injury and Abnormalities	1.61E-02-1.61E-02	2
			Hepatic System Disease	1.64E-02-1.64E-02	5
