# Supplementary material for: TFPI Alpha and Beta Regulate mRNAs and microRNAs Involved in Cancer Biology and in the Immune System in Breast Cancer Cells
Source: PLoS One. 2012 Oct 5;7(10):e47184. doi: 10.1371/journal.pone.0047184 (PMC3465304; doi:10.1371/journal.pone.0047184)
Supplement: Table S5 — Differentially expressed miRNAs following overexpression of TFPIα or TFPIβ in SK-BR-3 cells. (XLS) [file pone.0047184.s007.xls]

## Sheet: Sheet1
Table S5.
miRNA	Fold change		miRNA	Fold change		miRNA	Fold change
TFPIa vs. pTOPO
let-7a	-19.1		miR-100	-4.2		miR-320	-2.3
let-7b	-4.4		miR-101	-11.7		miR-324-3p	-5.9
let-7c	-6.4		miR-103	-6.2		miR-324-5p	-4.5
let-7d	-9.2		miR-106a	-7.3		miR-328	-4.5
let-7e	-7		miR-106b	-21.4		miR-331-3p	-2.2
let-7f	-11.2		miR-125b	-2.6		miR-335	-12.8
let-7g	-6.1		miR-126	-24		miR-339-3p	-2.9
miR-9	-35.7		miR-128	-81.5		miR-339-5p	-3.7
miR-15a	-560.8		miR-132	-7.8		miR-340	-42.2
miR-15b	-12.6		miR-135a	-17		miR-342-3p	-7.5
miR-16	-8.7		miR-135b	-24.7		miR-345	-6.7
miR-17	-7.7		miR-140-5p	-13.8		miR-361-5p	-2.8
miR-18a	-9.5		miR-141	-13.2		miR-362-5p	-21.2
miR-18b	-10.5		miR-146b-5p	-2.8		miR-365	-6.2
miR-19a	-12.4		miR-148a	-17.9		miR-374a	-20.5
miR-19b	-11.5		miR-148b	-5.1		miR-374b	-10.7
miR-20a	-11.6		miR-152	-15.4		miR-375	-17.9
miR-20b	-24.3		miR-181a	-8.1		miR-422a	-3.2
miR-21	-22.6		miR-182	-8.1		miR-425	-10.6
miR-23b	-9.7		miR-183	-17.2		miR-429	-20.8
miR-24	-6		miR-184	-5.3		miR-454	-12.5
miR-25	-9.9		miR-185	-20.2		miR-484	-2.3
miR-26a	-9		miR-186	-7.2		miR-486-5p	-13.9
miR-26b	-12.5		miR-191	-6.2		miR-489	-18.6
miR-27a	-29.1		miR-192	-6.4		miR-491-5p	-3.7
miR-27b	-16.6		miR-193a-5p	-3		miR-500	-12.2
miR-28-3p	-2.7		miR-193b	-2.9		miR-501-5p	-31.4
miR-28-5p	-12.6		miR-195	-6.3		miR-532-3p	-2.5
miR-29a	-12.4		miR-196b	-7.1		miR-532-5p	-16.5
miR-29c	-15.4		miR-200a	-17.1		miR-545	-15.9
miR-30b	-6.5		miR-200b	-12		miR-574-3p	-4.6
miR-30c	-6.9		miR-200c	-3.5		miR-590-5p	-12.8
miR-31	-2.3		miR-203	-18.7		miR-598	-5.8
miR-32	-4.3		miR-205	-4.2		miR-628-5p	-85.4
miR-34a	-12.2		miR-210	-4.2		miR-636	-6.4
miR-93	-11		miR-218	-3.6		miR-652	-5.5
miR-95	-59.4		miR-222	-2.1		miR-660	-36.8
miR-96	-29.8		miR-223	-2.6		miR-671-3p	-3.6
miR-98	-88.8		miR-301a	-13.1		miR-708	-5.7
miR-99a	-6.6		miR-301b	-5.2		miR-744	-2.2
TFPIb vs. pTOPO
miR-15a	-3.8		miR-193b	-10.4		miR-345	-2.6
miR-21	-7.2		miR-196b	-4.6		miR-361-5p	-2.3
miR-29c	2.5		miR-200a	-88.8		miR-365	-3.7
miR-30c	2.3		miR-200b	-9.8		miR-422a	3.8
miR-31	8.5		miR-203	-7.3		miR-425	-2.4
miR-93	-2		miR-205	2		miR-429	-216.7
miR-95	-173.6		miR-218	-13.6		miR-454	-3.4
miR-98	-4.1		miR-222	-5.3		miR-486-5p	-2.2
miR-101	-6.4		miR-23b	2		miR-489	-16.5
miR-126	-20.4		miR-296-5p	-2.1		miR-494	-2.5
miR-130b	3.9		miR-301a	-5.5		miR-628-5p	2.5
miR-135a	-16.8		miR-324-5p	-3.6		miR-636	-3
miR-135b	-10.6		miR-328	-6		miR-652	-2.2
miR-146b-5p	4		miR-339-5p	-2.7		miR-708	-91.5
miR-148b	-3.9		miR-342-3p	-11.2		miR-744	-2.9
miR-184	5
