# Supplementary material for: TFPI Alpha and Beta Regulate mRNAs and microRNAs Involved in Cancer Biology and in the Immune System in Breast Cancer Cells
Source: PLoS One. 2012 Oct 5;7(10):e47184. doi: 10.1371/journal.pone.0047184 (PMC3465304; doi:10.1371/journal.pone.0047184)
Supplement: Table S7 — Differentially expressed miRNAs with predicted gene targets oppositely expressed at the mRNA level in SK-BR-3 cells overexpressing TFPIα. Predicted mRNA targets in bold were also identified as possible targets in cells overexpressing TFPIβ. (XLS) [file pone.0047184.s009.xls]

## Sheet: Sheet1
Table S7.
miRNA	Fold change	Predicted mRNA targets
miRNA downregulated:mRNA upregulated
let-7a	-19.1	RASGRP1, TNFAIP3
let-7b	-4.4	RASGRP1, TNFAIP3
let-7d	-9.2	RASGRP1, TNFAIP3
let-7e	-7	RASGRP1, TNFAIP3
let-7f	-11.2	RASGRP1, TNFAIP3
let-7g	-6.1	RASGRP1, TNFAIP3
miR-9	-35.7	OPTN
miR-15a	-560.8	N4BP1, NAV1, RNF213, SEMA3D, SWAP70
miR-15b	-12.6	N4BP1, NAV1, RNF213, SEMA3D, SWAP70
miR-16	-8.7	FERMT2, N4BP1, NAV1, RNF213, SEMA3D, SWAP70
miR-17	-7.7	ADAR, MASTL, NTN4, PRR15, STAT3, ZNFX1
miR-18a	-9.5	NAV1, TNFAIP3
miR-18b	-10.5	NAV1, TNFAIP3
miR-19a	-12.4	ACSL1, KIAA1217, STAT2, TNFAIP3, TOR1B
miR-19b	-11.5	ACSL1, KIAA1217, STAT2, TNFAIP3, TOR1B
miR-20a	-11.6	ADAR, MASTL, NTN4, PRR15, STAT3, ZNFX1
miR-20b	-24.3	ADAR, MASTL, NTN4, PRR15, STAT3, ZNFX1
miR-21	-22.6	RASGRP1
miR-23b	-9.7	N4BP1, TNFAIP3
miR-24	-6	PML, SPSB1
miR-25	-9.9	SPSB1
miR-26a	-9	BAK1, NAV1, WNT5A
miR-26b	-12.5	BAK1, NAV1, WNT5A
miR-27a	-29.1	BAK1, GABRP, MMP13, N4BP1
miR-27b	-16.6	BAK1, GABRP, MMP13, N4BP1
miR-28-3p	-2.7	PARP8
miR-28-5p	-12.6	N4BP1
miR-29a	-12.4	BAK1, FERMT2, NAV1, TNFAIP3
miR-29c	-15.4	BAK1, FERMT2, NAV1, TNFAIP3
miR-30b	-6.5	NAV1, NT5E
miR-30c	-6.9	NAV1, NT5E
miR-31	-2.3	CNP, KRT80
miR-32	-4.3	SPSB1
miR-34a	-12.2	ACSL1, KIAA1217, NAV1, RNF213, TPD52
miR-93	-11	ADAR, MASTL, NTN4, PRR15, STAT3, ZNFX1
miR-96	-29.8	KIAA1217, N4BP1, NTN4, SPSB1
miR-98	-88.8	RASGRP1, TNFAIP3
miR-101	-11.7	KIAA1217, SWAP70
miR-103	-6.2	FERMT2, N4BP1, NAV1, TPD52
miR-106a	-7.3	ADAR, MASTL, NTN4, PRR15, STAT3, ZNFX1
miR-106b	-21.4	ADAR, MASTL, NTN4, PRR15, STAT3, ZNFX1
miR-125b	-2.6	BAK1, PSMB8, STAT3, TNFAIP3
miR-128	-81.5	N4BP1
miR-135a	-17	DTX3L, FERMT2
miR-135b	-24.7	DTX3L, FERMT2
miR-141	-13.2	TGFB2, WNT5A
miR-148a	-17.9	KIAA1217
miR-148b	-5.1	KIAA1217
miR-152	-15.4	KIAA1217
miR-181a	-8.1	ACSL1, SAMHD1
miR-182	-8.1	KIAA1217, N4BP1, WNT5A
miR-183	-17.2	PNPT1
miR-185	-20.2	TAPBP
miR-186	-7.2	C6orf145, SPSB1, WNT5A
miR-192	-6.4	RSAD2
miR-193b	-2.9	NT5E
miR-195	-6.3	FERMT2, N4BP1, NAV1, RNF213, SEMA3D, SWAP70
miR-196b	-7.1	RASGRP1
miR-200a	-17.1	TGFB2, WNT5A
miR-200b	-12	KRT80
miR-200c	-3.5	KRT80
miR-203	-18.7	ACSL1, PDGFD
miR-205	-4.2	ACSL1, CNP, IFI44L, RNF213
miR-218	-3.6	ACSL1, N4BP1, SPSB1, TPD52, ZNFX1
miR-301a	-13.1	ACSL1, FERMT2, KIAA1217, N4BP1
miR-301b	-5.2	ACSL1, FERMT2, KIAA1217, N4BP1
miR-331-3p	-2.2	UBE2l6
miR-335	-12.8	N4BP1
miR-339-3p	-2.9	TAPBP
miR-340	-42.2	ACSL1, TAP1, USP18
miR-361-5p	-2.8	ELOVL7
miR-362-5p	-21.2	DDX58, NAV1
miR-365	-6.2	ADAR, WNT5A
miR-374a	-20.5	IFIT5, SEMA3D, WNT5A
miR-374b	-10.7	IFIT5, SEMA3D, WNT5A
miR-429	-20.8	KRT80
miR-454	-12.5	ACSL1, FERMT2, KIAA1217, N4BP1
miR-484	-2.3	NAV1
miR-532-5p	-16.5	GBP1, TAP1
miR-545	-15.9	DDX58, ELOVL7, PDGFD, WNT5A
miR-590-5p	-12.8	RASGRP1
miR-636	-6.4	ACSL1, SPSB1, TPD52
miR-708	-5.7	N4BP1
