# Supplementary material for: TFPI Alpha and Beta Regulate mRNAs and microRNAs Involved in Cancer Biology and in the Immune System in Breast Cancer Cells
Source: PLoS One. 2012 Oct 5;7(10):e47184. doi: 10.1371/journal.pone.0047184 (PMC3465304; doi:10.1371/journal.pone.0047184)
Supplement: Table S8 — Differentially expressed miRNAs with predicted gene targets oppositely expressed at the mRNA level in SK-BR-3 cells overexpressing TFPIβ. Predicted mRNA targets in bold were also identified as possible targets in cells overexpressing TFPIα. (XLS) [file pone.0047184.s010.xls]

## Sheet: Sheet1
Table S8.
miRNA	Fold change	Predicted mRNA targets
miRNA downregulated:mRNA upregulated
miR-15a	-3.8	ADORA2A, AMOTL1, ANKRD13B, ASPH, CACNB1, CALU, CDK6, CDS2, CHORDC1, CPD, EVI5, FAM63B, FERMT2, HIGD1A, KCNN4, LMO7, MED1, MGAT4A, MOBKL2B, NAV1, NEBL, NUFIP2, RNF144B, RNF213, SIDT2, SWAP70, TACC1, TRAM1, TRIM2, USP53
miR-21	-7.2	CDK6, FAM63B, IL12A, JPH1, LANCL1, OLR1, PDZD2, VCL, ZNF704
miR-93	-2	C2CD2, CAMK2N1, CANT1, CLIP4, DOCK4, FAM3C, FNBP1L, GAB1, GOSR1, HEG1, KRT81, LIMA1, MFAP3L, MICAL3, MID1, MKLN1, MTMR2, NTN4, NUFIP2, ORMDL3, PTPN21, RAPGEF5, RND3, RPS6KA5, SAMD12, SASH1, SLC40A1, SMOC1, SORL1, STAT3, TACC1, THRA, TIMP2, TMEM123, TRIM3, TRPV6, USP53, WIPF2, WWC2, ZNF704
miR-98	-4.1	ABCC5, BACE2, CACNA1D, CALU, CANT1, CPD, CPEB4, CTNS, CTSC, DCUN1D2, DOCK3, DUSP4, EDN1, FAM135A, GLRX, LGR4, LIPH, MFAP3L, MGAT4A, MOBKL2B, OLR1, OSBPL3, PXDN, RAB15, RALB, RDH10, SAMD12, SLC2A12, SMCR7L, TMC7, TMEM65, TMPRSS2, UTRN
miR-101	-6.4	ABCC5, ADAM19, ALDH1A3, ATP8A1, CDC42EP3, DOCK3, EMP1, GK5, HEG1, KCNH7, KIAA1217, KITLG, MGAT4A, MTMR2, NUFIP2, PDE4D, RAB15, RNF219, SASH1, SWAP70, TES, TMEM65, TP53INP2, UBE2D1
miR-135a	-16.8	ADAM19, ALCAM, ARHGEF2, ASPH, ATP8A1, B4GALT5, C2CD2, CACNA1D, CDR2L, CHP, CPD, EVI5, FERMT2, FUT9, GCNT2, GK5, GPR180, LANCL1, MED1, MTMR2, NUFIP2, PDE8B, RRBP1, UTRN, ZNF704
miR-135b	-10.6	ADAM19, ALCAM, ARHGEF2, ASPH, ATP8A1, B4GALT5, C2CD2, CACNA1D, CDR2L, CHP, CPD, EVI5, FERMT2, FUT9, GCNT2, GK5, GPR180, LANCL1, MED1, MTMR2, NUFIP2, PDE8B, RRBP1, UTRN, ZNF704
miR-148b	-3.9	ALCAM, ANKRD13A, ASPH, ATP8A1, B4GALT5, C1GALT1, CAST, CDK6, CPD, CPEB4, DSC2, EPAS1, FUT9, KIAA1217, MBOAT2, MED1, MGAT4A, OXSR1, PDE4D, PDE5A, PRNP, RNF219, SBF2, UBE2D1
miR-193b	-10.4	ANKRD13A, CALB1, GRB7, HEG1, LGR4, MKLN1, NT5E, NUFIP2, SLC15A1
miR-196b	-4.6	CPD, DOCK3, MGAT4A, RAPGEF5, SLC2A12, SMCR7L
miR-200a	-88.8	ATP8A1, ATRN, CALU, CDC42EP3, CDK6, CHKA, CPEB4, CRLF3, DOCK4, FNBP1L, GAB1, GCNT2, GOLM1, KIAA1826, MOBKL2B, NUFIP2, OXSR1, PDZD2, PHYHIPL, PLCB4, RAPGEF5, RNF145, SIDT2, TRIM2, USP53, WNT5A
miR-200b	-9.8	CALU, CDR2L, CHN2, CNN3, CYP1B1, DOCK4, EMP1, EVI5, GAB1, HEG1, KRT80, LMO7, MBOAT2, MED1, MKLN1, NDST1, NUFIP2, ORMDL3, PLS3, PTPN21, PVRL4, RDH10, RND3, SGCE, SLC16A2, SMCR7L, TIMP2, TMEM70, TC33, TWISTNB, UBE2D1
miR-203	-7.3	ACSL1, ANKRD13B, CPEB4, CTSC, EHF, GALNT10, GPR180, KCNMA1, LIMCH1, MKLN1, MOBKL2B, NDRG3, NUFIP2, PDE4D, PDGFD, PXDN, RAB15, RTKN2, SBF2, TRIM2, ZMIZ1
miR-218	-13.6	ACSL1, ANKRD13B, ATRN, BIVM, CCDC55, CDK6, DOCK9, ELMO1, FAM3C, FAM63B, FUT9, KIAA1161, KIF16B, LGR4, LMO7, MED1, NEBL, OXSR1, PPP2R5A, RNF219, SAMD12, SASH1, SH3BP4, SLAIN1, TACC1, TPD52, WIPF2, ZMIZ1
miR-222	-5.3	ASPH, CYR61, HEG1, KIF16B, MED1, NUFIP2, OSBPL3, SH3BP4, SLC40A1, TIMP2, TP53INP2
miR-296-5p	-2.1	ARHGEF2
miR-301a	-5.5	ACSL1, ATRN, B4GALT5, CALB1, CAST, CPEB4, DIAPH3, DOCK3, EDN1, FERMT2, FUT9, HEG1, KIAA1217, MOBKL2B, PMEPA1, PRNP, PXDN, RNF145, SASH1, SBF2, SLAIN1, SLC25A12, SMOC1, TACC1, TIMP2, TRIM2, TRIM3, UBE2D1
miR-328	-6	LGR4, NUFIP2, PGM5
miR-339-5p	-2.7	FBXO30, MED1, THRA
miR-342-3p	-11.2	CAMK2N1, CDK6, CPEB4, GOLM1, GOSR1, PDE4D, SDC1, UQCC
miR-345	-2.6	CDC42EP3, DHCR24, KITLG
miR-361-5p	-2.4	CAMK2D, EHF, FUT9, MGAT4A, MTRR, NEBL
miR-365	-3.7	CHP, DLAT, DLX3, DOCK4, EHF, EPAS1, NUFIP2, PDE4D, PLCB4, S100A14, SLC16A2, WNT5A
miR-425	-2.4	FAM63B, FUT9, NUFIP2, RNF145, RNF219, TIMP2
miR-429	-216.7	CALU, CDR2L, CHN2, CNN3, CYP1B1, DOCK4, EVI5, GAB1, HEG1, KRT80, LMO7, MBOAT2, MED1, MKLN1, NDST1, NUFIP2, ORMDL3, PLS3, PTPN21, PVRL4, RDH10, RND3, SGCE, SLC16A2, SMCR7L, TIMP2, TMEM70, TTC33, TWISTNB, UBE2D1
miR-454	-3.4	ACSL1, ATRN, B4GALT5, CALB1, CAST, CPEB4, DIAPH3, DOCK3, EDN1, FERMT2, FUT9, HEG1, KIAA1217, MOBKL2B, PMEPA1, PRNP, PXDN, RNF145, SASH1, SBF2, SLAIN1, SLC25A12, SMOC1, TACC1, TIMP2, TRIM2, TRIM3, UBE2D1
miR-486-5p	-2.3	DOCK3, MID1, SMOC1
miR-489	-16.5	CACNA1D, LIPH, MFAP3L, MYCBP2, NUFIP2, TIMP2
miR-494	-2.5	C5orf23, CAMK2D, CAST, CDK6, CUL4A, EVI5, FGFR2, GK5, GPNMB, P4HA1, SMCR7L, TACC1, TACC2, WWC2
miR-636	-3	ACSL1, ANKRD13B, BIVM, CALU, DOCK9, ELMO1, FAM3C, FAM63B, FBXO30, FUT9, KIAA1161, NUFIP2, OXSR1, RNF219, SAMD12, SASH1, TACC1, TPD52, ZMIZ1
miR-708	-91.5	CANT1, SDC1, WIPF2
miRNA upregulated:mRNA downregulated
miR-23b	2	ADCY1, ANKRD50, ATP11C, C3orf57, DACH1, ELOVL2, GPC4, HIPK2, KIAA1467, LONRF2, MAP4K4, PCDH19, PDCD4, PGR, PRMT6, RNF43, SLC6A14, TMEM64
miR-29c	2.5	ADAMTS9, BDH1, FREM2, LAMC1, MAP4K4, NCOA3, PIK3R1, PPM1E, THSD4
miR-30c	2.3	ADAMTS9, BCL2, CCNK, DHX40, DPY19L1, GPR125, HIPK2, IGF1R, INTS2, MAP4K4, NCOA3, NR2F2, NRIP1, PCDH10, PCDH19, PFN2, RAP2C, RAVER2, STK39, WIPF1
miR-130b	3.9	ADAMTS19, ADCY1, EPHA7, ESR1, LAMC1, LRP1B, MAP4K4, MYB, NCOA3, PTPRG, RAP2C, SIPA1L2, USP32
miR-146b-5p	4	MMP16, NRAS, SIAH2
miR-205	2	ADAMTS0, CTPS2, GATA3, LAMC1, MED13L, SLC19A2
miR-422a	3.8	C1orf21, IGF1R
miR-628-5p	2.5	MMP16
